# Supplementary material for: Environmental Barcoding Reveals Massive Dinoflagellate Diversity in Marine Environments
Source: PLoS One. 2010 Nov 15;5(11):e13991. doi: 10.1371/journal.pone.0013991 (PMC2981561; doi:10.1371/journal.pone.0013991)
Supplement: Table S1 — Identification of Cultivated and Genbank deposited Dinoflagellate Strains in this Study Using COI barcodes. PWD cut-off of Species-O.T.U is 0.24% or less, Genera 0.T.U is 1.4% or less. Strain Synonyms are indicated in brackets. Identification of COI barcode are explained in the materials and methods. Cross in brackets indicates a strain is over the species cut-off value for its group, explained in main text. Star indicates a strain shows either partial identity with its barcode group or identity to more than one barcode group due to insufficient marker resolution. Misidentified strains are highlighted in italics. (0.16 MB XLS) [file pone.0013991.s004.xls]

## Sheet: Sheet1
Table S1. Identification of Cultivated and Genbank deposited Dinoflagellate Strains in this Study Using COI barcodes.
Number	BOLD label	Accession	Initial identity	Species O.T.U	Genera O.T.U	Strain name/source (synonyms)
1	DINO474-07	GQ501109	Adenoides eludens	Adenoides eludens	Adenoides	CCMP 1891
2	DACOI002-09	GQ501108	Adenoides eludens	Adenoides eludens	Adenoides	NIES-1367
3	DINO1152-08	GQ501113	Akashiwo sanguinea	Akashiwo sanguinea	Akashiwo	NEPCC 902
4	DINO1083-08	GQ501114	Akashiwo sanguinea	Akashiwo sanguinea	Akashiwo	MH
5	DINO602-07	GQ501112	Akashiwo sanguinea	Akashiwo sanguinea	Akashiwo	CCMP 1593
6	DINO340-07	GQ501110	Akashiwo sanguinea	Akashiwo sanguinea	Akashiwo	CCMP1321
7	Genbank deposited	EU126138	Akashiwo sanguinea	Akashiwo sanguinea	Akashiwo	strain LIS1
8	DINO004-06	GQ501116	Alexandrium affine	Alexandrium sp.	Alexandrium	NEPCC667 (CCMP112)
9	DINO756-07	GQ501120	Alexandrium affine	Alexandrium sp.	Alexandrium	CS-312/02
10	DINO754-07	GQ501119	Alexandrium affine	Alexandrium sp.	Alexandrium	CS-312/01
11	DINO574-07	GQ501121	Alexandrium affine	Alexandrium sp. (x)	Alexandrium	CS-312/03
12	DINO1131-08	GQ501118	Alexandrium affine	Alexandrium sp.	Alexandrium	CCMP 112 (NEPCC 667)
13	Genbank deposited	AB290127	Alexandrium affine	Alexandrium sp.	Alexandrium	none
14	DINO734-07	GQ501122	Alexandrium catenella	Alexandrium sp.	Alexandrium	CS-798/03
15	DINO705-07	GQ501132	Alexandrium Catenella	Alexandrium sp.	Alexandrium	CS-319
16	DINO700-07	GQ501130	Alexandrium Catenella	Alexandrium sp.	Alexandrium	CS-313/04
17	DINO562-07	GQ501124	Alexandrium catenella	Alexandrium sp.	Alexandrium	CS-798/06
18	DINO732-07	GQ501127	Alexandrium catenella	Alexandrium sp.	Alexandrium	CS-798/02
19	DINO748-07	GQ501126	Alexandrium catenella	Alexandrium sp.	Alexandrium	CS-313/01
20	DINO694-07	GQ501129	Alexandrium Catenella	Alexandrium sp. (x)	Alexandrium	CS-315
21	DINO733-07	GQ501128	Alexandrium catenella	Alexandrium sp.	Alexandrium	CS-314/09
22	DINO704-07	GQ501131	Alexandrium Catenella	Alexandrium sp.	Alexandrium	CS-313/06
23	DINO731-07	GQ501123	Alexandrium catenella	Alexandrium sp.	Alexandrium	CS-313/05
24	DINO567-07	GQ501125	Alexandrium catenella	Alexandrium sp.	Alexandrium	CS-798/01
25	Genbank deposited	AB290123	Alexandrium catenella	Alexandrium sp.	Alexandrium	ACY9
27	DINO430-07	GQ501133	Alexandrium cf. catenella	Alexandrium sp.	Alexandrium	CCMP 1911
28	DINOB832-08	GQ501136	Alexandrium concavum	Alexandrium sp. (x)	Alexandrium	CAWD52
29	DINOB830-08	GQ501135	Alexandrium concavum	Alexandrium sp.	Alexandrium	CAWD51
30	DINO642-07	GQ501138	Alexandrium fundyense	Alexandrium sp.	Alexandrium	CCMP1980
31	DINO432-07	GQ501137	Alexandrium fundyense	Alexandrium sp.	Alexandrium	CCMP 1978
33	DINO1134-08	GQ501139	Alexandrium insuetum	Alexandrium sp.	Alexandrium	CCMP2082
34	DINO096-06	GQ501141	Alexandrium lusitanicum	Alexandrium sp.	Alexandrium	CCMP1888
35	DINO559-07	GQ501143	Alexandrium minutum	Alexandrium sp.	Alexandrium	CS-323/06
36	DINO572-07	GQ501146	Alexandrium minutum	Alexandrium sp.	Alexandrium	NEPCC 820
37	DINO575-07	GQ501148	Alexandrium minutum	Alexandrium sp.	Alexandrium	CS-323/08
38	DINO556-07	GQ501150	Alexandrium minutum	Alexandrium sp.	Alexandrium	CS-325/26
39	DINO564-07	GQ501147	Alexandrium minutum	Alexandrium sp.	Alexandrium	CS-324/15
40	DINO576-07	GQ501145	Alexandrium minutum	Alexandrium sp.	Alexandrium	CS-323/03
41	DINO566-07	GQ501149	Alexandrium minutum	Alexandrium sp.	Alexandrium	CS-323/01
42	DINO568-07	GQ501142	Alexandrium minutum	Alexandrium sp.	Alexandrium	CS-320/02
43	DINO563-07	GQ501144	Alexandrium minutum	Alexandrium sp.	Alexandrium	CS-325/22
44	DINO741-07	GQ501153	Alexandrium minutum	Alexandrium sp.	Alexandrium	CS-325/25
45	DINO740-07	GQ501152	Alexandrium minutum	Alexandrium sp.	Alexandrium	CS-324/12
46	DINO837-07	GQ501158	Alexandrium minutum	Alexandrium sp.	Alexandrium	AC194
47	DINO738-07	GQ501155	Alexandrium minutum	Alexandrium sp.	Alexandrium	CS-323/02
48	DINO105-06	GQ501156	Alexandrium minutum	Alexandrium sp.	Alexandrium	CCMP 113
49	DINO730-07	GQ501157	Alexandrium minutum	Alexandrium sp.	Alexandrium	CS-325/20
50	DINO696-07	GQ501154	Alexandrium minutum	Alexandrium sp.	Alexandrium	CS-324/13
51	DINO1057-08	GQ501159	Alexandrium ostenfeldii	Alexandrium sp. (x)	Alexandrium	CCMP 1773
52	DINOB848-08	GQ501160	Alexandrium pseudogonyaulax	Alexandrium pseudogonyaulax	Alexandrium	CAWD-138
53	DINOB834-08	GQ501161	Alexandrium pseudogonyaulax	Alexandrium pseudogonyaulax	Alexandrium	CAWD 54
54	Genbank deposited	AB290129	Alexandrium pseudogonyaulax	Alexandrium pseudogonyaulax	Alexandrium	none
55	DINO577-07	GQ501165	Alexandrium sp.	Alexandrium sp.	Alexandrium	CS-300/01
56	DINO1039-08	GQ501171	Alexandrium sp.	Alexandrium sp.	Alexandrium	CCMP 2722
57	DINO634-07	GQ501167	Alexandrium sp.	Alexandrium sp.	Alexandrium	CCMP 2080
58	DINO545-07	GQ501169	Alexandrium sp.	Alexandrium sp.	Alexandrium	CCMP1909
59	DINO542-07	GQ501162	Alexandrium sp.	Alexandrium sp.	Alexandrium	CCMP2723
60	DINO539-07	GQ501164	Alexandrium sp.	Alexandrium sp.	Alexandrium	CCMP2304
61	DINO528-07	GQ501163	Alexandrium sp.	Alexandrium sp.	Alexandrium	CCMP2725
62	DINO629-07	GQ501172	Alexandrium sp.	Alexandrium sp.	Alexandrium	CCMP 2079
63	DINO459-07	GQ501173	Alexandrium sp.	Alexandrium sp.	Alexandrium	CCAP 1119/14
64	DINO529-07	GQ501168	Alexandrium sp.	Alexandrium sp.	Alexandrium	CCMP2724
65	DINO630-07	same as 64	Alexandrium sp.	Alexandrium sp.	Alexandrium	CCMP 2724
67	DINO1052-08	GQ501183	Alexandrium tamarense	Alexandrium sp.	Alexandrium	CCMP 116
68	DINO016-06	GQ501181	Alexandrium tamarense	Alexandrium sp.	Alexandrium	CCMP115 (NEPCC183)
69	DINO557-07	GQ501178	Alexandrium tamarense	Alexandrium sp.	Alexandrium	CS-314/07
70	DINO1024-08	GQ501177	Alexandrium tamarense	Alexandrium sp. (x)	Alexandrium	NEPCC 183 (CCMP115)
71	DINO497-07	GQ501182	Alexandrium tamarense	Alexandrium sp.	Alexandrium	CCMP1598
72	DINO558-07	GQ501179	Alexandrium tamarense	Alexandrium sp.	Alexandrium	CS-298
73	DINO1029-08	GQ501176	Alexandrium tamarense	Alexandrium pseudogonyaulax	Alexandrium	CCAP 1119/11 (CCMP1771)
74	DINO084-06	GQ501180	Alexandrium tamarense	Alexandrium pseudogonyaulax	Alexandrium	CCAP1119/1 (Plymouth 173, CCMP11, NEPCC 183)
75	Genbank deposited	EU126139	Alexandrium tamarense	Alexandrium sp.	Alexandrium	CB307
76	Genbank deposited	AB290125	Alexandrium tamarense	Alexandrium sp.	Alexandrium	HAT18
77	Genbank deposited	AB290121	Alexandrium tamiyavanichi	Alexandrium sp.	Alexandrium	strain: 04-3
78	DINO853-07	GQ501253	Antarctic Dinoflagellate RS24	Kareniaceae RS24 sp.	Kareniaceae RS24 genus	RS-24
79	DINO1143-08	GQ501187	Coolia monotis	Coolia monotis	Coolia	CCMP1345
80	DINOB827-08	GQ501185	Coolia monotis	Coolia monotis	Coolia	CAWD39
81	DINO1058-08	GQ501186	Coolia monotis	Coolia monotis	Coolia	CCMP 304
82	DINO849-07	GQ501188	Coolia sp.	Coolia monotis	Coolia	AC222
83	DINO1061-08	GQ501190	Cryptoperidiniopsis brodyi	Cryptoperidiniopsis brodyi	Pfiesteria/Cryptoperidiniopsis	CCMP 2781
84	DINO911-08	GQ501195	Cryptoperidiniopsis sp.	Pfiesteria piscida	Pfiesteria/Cryptoperidiniopsis	CCMP 2784
85	DINO922-08	GQ501192	Cryptoperidiniopsis sp.	Cryptoperidiniopsis brodyi	Pfiesteria/Cryptoperidiniopsis	CCMP 2833
86	DINO918-08	GQ501194	Cryptoperidiniopsis sp.	Cryptoperidiniopsis brodyi	Pfiesteria/Cryptoperidiniopsis	CCMP 2786
87	DINO921-08	GQ501191	Cryptoperidiniopsis sp.	Cryptoperidiniopsis brodyi	Pfiesteria/Cryptoperidiniopsis	CCMP 2789
88	DINO1034-08	GQ501193	Cryptoperidiniopsis sp.	Cryptoperidiniopsis brodyi	Pfiesteria/Cryptoperidiniopsis	CCMP 2787
89	Genbank deposited	EU130566	Dinophysis acuminata	Dinophysis acuminata	Dinophysis	"Narragansett Bay sample"
90	DINO520-07	GQ501215	Gambierdiscus toxicus	Gambierdiscus toxicus	Gambierdiscus	CCMP399
91	DINO607-07	GQ501213	Gambierdiscus toxicus	Gambierdiscus toxicus	Gambierdiscus	CCMP 1655
92	DINO616-07	GQ501214	Gambierdiscus toxicus	Gambierdiscus toxicus	Gambierdiscus	CCMP 1652
93	DINOB833-08	GQ501216	Gonyaulax hyalina	Gonyaulax hyalina	Gonyaulax	CAWD100
94	DINO843-07	GQ501217	Gonyaulax sp.	Gonyaulax sp. 1	Gonyaulax	AC551
95	DINO329-07	GQ501218	Gonyaulax spinifera	Gonyaulax spinifera	Gonyaulax	CCMP409
97	DINO725-07	GQ501220	Gymnodinium catenatum	Gymnodinium catenatum	Gymnodinium genus 3	CS-302/16
99	DINO722-07	GQ501230	Gymnodinium catenatum	Gymnodinium catenatum	Gymnodinium genus 3	CS-301/05
100	DINO721-07	GQ501229	Gymnodinium catenatum	Gymnodinium catenatum	Gymnodinium genus 3	CS-301/06
101	DINO720-07	GQ501219	Gymnodinium catenatum	Gymnodinium catenatum	Gymnodinium genus 3	CS-309/03
102	DINO555-07	GQ501222	Gymnodinium catenatum	Gymnodinium catenatum	Gymnodinium genus 3	CS-302/20
103	DINO735-07	GQ501226	Gymnodinium catenatum	Gymnodinium catenatum	Gymnodinium genus 3	CS-396/03
104	DINO744-07	GQ501225	Gymnodinium catenatum	Gymnodinium catenatum	Gymnodinium genus 3	CS-397
105	DINO726-07	GQ501228	Gymnodinium catenatum	Gymnodinium catenatum	Gymnodinium genus 3	CS-396/02
106	DINO727-07	GQ501224	Gymnodinium catenatum	Gymnodinium catenatum	Gymnodinium genus 3	CS-393/14
107	DINO729-07	GQ501227	Gymnodinium catenatum	Gymnodinium catenatum	Gymnodinium genus 3	CS-800
108	DINO560-07	GQ501232	Gymnodinium catenatum	Gymnodinium catenatum	Gymnodinium genus 3	CS-301/08
109	DINO350-07	GQ501231	Gymnodinium catenatum	Gymnodinium catenatum	Gymnodinium genus 3	NEPCC 844 (CCMP1940, CCMP412)
110	DINO839-07	GQ501234	Gymnodinium chlorophorum	Gymnodinium chlorophorum	Gymnodinium genus 3	AC195
111	DINOB836-08	GQ501233	Gymnodinium chlorophorum	Gymnodinium chlorophorum	Gymnodinium genus 3	CAWD62
112	DINO339-07	GQ501235	Gymnodinium impudicum	Gymnodinium impudicum	Gymnodinium genus 1	CCMP2214
113	DINO492-07	GQ501236	Gymnodinium impudicum	Gymnodinium impudicum	Gymnodinium genus 1	CCMP413
114	DINO848-07	GQ501251	Gymnodinium mikimotoi	Karenia mikimotoi	Karenia	AC213
115	Genbank deposited	AY289695	Gymnodinium simplex (now renamed Symbiodinium sp.)	Gymnodinium simplex/Symbiodinium sp.	Gymnodinium genus 2	CCMP2431
116	DINO742-07	GQ501255	Gymnodinium sp.	Karlodinium veneficum	Karlodinium	CS-893
117	DINO840-07	GQ501240	Gymnodinium sp.	Gymnodinium catenatum*	Gymnodinium genus 3	AC210
118	DINO1060-08	GQ501239	Gymnodinium sp.	Gymnodinium sp. 1	Gymnodinium genus 2	CCMP 425
119	DINO852-07	GQ501241	Gymnodinium sp.	Symbiodinium clade E (x)	Symbiodinium clade E (x)	AC561
120	DINO580-07	HM236196	Gymnodinium sp.	Gymnodinium sp. 2	Symbiodinium clade A	CCMP 424
121	DINO355-07	GQ501242	Symbiodinium sp. clade E	Symbiodinium clade E (x)	Symbiodinium clade E (x)	NEPCC 795 (CCMP421, NEPCC795, NEPCC737, NEPCC860)
122	DINO485-07	GQ501243	Gyrodinium instriatum	Gyrodinium instriatum	Gyrodinium	CCMP2935
123	DINO437-07	GQ501245	Gyrodinium instriatum	Gyrodinium instriatum	Gyrodinium	CCMP 432
124	DINO358-07	GQ501244	Gyrodinium instriatum	Gyrodinium instriatum	Gyrodinium	NEPCC 796 (CCMP431)
125	Genbank deposited	AY786473	Gyrodinium instriatum	Gyrodinium instriatum	Gyrodinium	JWO10818-1D5
126	DINO027-06	GQ501250	Karenia brevis	Karenia sp.	Karenia sp.	NEPCC797 (CCMP718)
127	DINO526-07	GQ501246	Karenia brevis	Karenia sp.	Karenia sp.	CCMP718 (NEPCC797)
128	DINO506-07	GQ501248	Karenia brevis	Karenia sp.	Karenia sp.	CCMP2820
129	DINO488-07	GQ501247	Karenia brevis	Karenia sp.	Karenia sp.	CCMP2229
130	DINO624-07	GQ501249	Karenia brevis	Karenia sp.	Karenia sp.	CCMP 2281
131	Genbank deposited	EU043068	Karenia brevis	Karenia sp.	Karenia sp.	strain NOAA-1
132	Genbank deposited	EU043071	Karenia brevis	Karenia sp.	Karenia sp.	strain SP3
133	Genbank deposited	AY350453	Karenia brevis	Karenia sp.	Karenia sp.	unknown
134	Genbank deposited	EU126144	Karenia brevis	Karenia sp.	Karenia sp.	CCMP2281
135	Genbank deposited	EU043065	Karenia brevis	Karenia sp.	Karenia sp.	strain JR
136	Genbank deposited	EU043066	Karenia brevis	Karenia sp.	Karenia sp.	strain JR-1
137	Genbank deposited	EU043069	Karenia brevis	Karenia sp.	Karenia sp.	strain PNAS
138	Genbank deposited	EU043070	Karenia brevis	Karenia sp.	Karenia sp.	strain SP2
141	Genbank deposited	EU043061	Karenia brevis	Karenia sp.	Karenia sp.	CCMP2228
142	DINO1156-08	GQ501252	Karenia mikimotoi	Karenia sp.	Karenia sp.	CCMP429
144	DINO1159-08	GQ501257	Karlodinium veneficum	Karlodinium veneficum	Karlodinium veneficum	NEPCC 734 (CCMP415)
145	DINO111-06	GQ501261	Karlodinium veneficum	Karlodinium veneficum	Karlodinium veneficum	CCMP415 (NPECC 734)
146	DINO601-07	GQ501258	Karlodinium veneficum	Karlodinium veneficum	Karlodinium veneficum	CCMP 2282
147	DINO1038-08	GQ501259	Karlodinium sp.	Karlodinium sp.	Karlodinium sp.	CCMP 2283
148	Genbank deposited	AF463416	Karlodinium veneficum	Karlodinium veneficum	Karlodinium veneficum	unknown
149	DINOB847-08	GQ501260	Karlodinium veneficum	Karlodinium veneficum	Karlodinium veneficum	CAWD-84
150	DINO508-07	GQ501256	Karlodinium veneficum	Karlodinium veneficum	Karlodinium veneficum	CCMP 2936
151	DINO632-07	GQ501265	Lingulodinium polyedrum	Lingulodinium/Protoceratium	Lingulodinium/Protoceratium	CCMP 1932
152	DINO538-07	HM236198	Lingulodinium polyedrum	Lingulodinium/Protoceratium	Lingulodinium/Protoceratium	CCMP1738
153	DINO635-07	GQ501266	Lingulodinium polyedrum	Lingulodinium/Protoceratium	Lingulodinium/Protoceratium	CCMP 1933
154	DINO518-07	GQ501263	Lingulodinium polyedrum	Lingulodinium/Protoceratium	Lingulodinium/Protoceratium	CCMP 1935
155	DINO001-06	GQ501264	Lingulodinium polyedrum	Lingulodinium/Protoceratium	Lingulodinium/Protoceratium	CCAP1121/5
156	DINO1128-08	GQ501267	Lingulodinium polyedrum	Lingulodinium/Protoceratium	Lingulodinium/Protoceratium	CCAP1121/ 2
157	DINO777-07	GQ501269	Peridinium inconspicuum	Peridinium inconspicuum	Peridinium	UTEX 2255
158	DINO468-07	GQ501268	Peridinium inconspicuum	Peridinium inconspicuum	Peridinium	CCAP 1140/3
159	Genbank deposited	AB232671	Peridinium willei	Peridinium willei	Peridinium	TK007
160	DINO1049-08	GQ501277	Pfiesteria piscicida	Pfiesteria piscicida	Pfiesteria/Cryptoperidiniopsis	CCMP 2362
161	DINO591-07	GQ501280	Pfiesteria piscicida	Pfiesteria piscicida	Pfiesteria/Cryptoperidiniopsis	CCMP 2091
162	DINO994-08	GQ501278	Pfiesteria piscicida	Pfiesteria piscicida	Pfiesteria/Cryptoperidiniopsis	CCMP 1921
163	DINO1007-08	GQ501279	Pfiesteria piscicida	Pfiesteria piscicida	Pfiesteria/Cryptoperidiniopsis	CCMP 1831
164	Genbank deposited	AF463412	Pfiesteria piscicida	Pfiesteria piscicida	Pfiesteria/Cryptoperidiniopsis	CCMP1831
165	Genbank deposited	AY072055	Pfiesteria shumwayae	Pfiesteria shumwayae	Pfiesteria/Cryptoperidiniopsis	unknown
166	Genbank deposited	AY072056	Cryptoperidiniopsis sp.	Pfiesteria piscicida	Pfiesteria/Cryptoperidiniopsis	CCMP 1828
167	DINO588-07	GQ501281	Pfiesteria shumwayae	Pfiesteria shumwayae	Pfiesteria/Cryptoperidiniopsis	CCMP 2089
168	Genbank deposited	EU130570	Pfiesteria shumwayae	Pfiesteria shumwayae	Pfiesteria/Cryptoperidiniopsis	T4, P.Tester
169	DINO590-07	GQ501276	Pfiesteria-like	Pfiesteria piscicida	Pfiesteria/Cryptoperidiniopsis	CCMP 1829
170	DINO600-07	GQ501272	Pfiesteria-like	Cryptoperidiniopsis brodyi	Pfiesteria/Cryptoperidiniopsis	CCMP 2300
171	DINO640-07	GQ501273	Pfiesteria-like	Cryptoperidiniopsis brodyi	Pfiesteria/Cryptoperidiniopsis	CCMP 2182
172	DINO992-08	GQ501204	Pfiesteria-like	Luciella masanensis ribotype 1	Pfiesteria/Cryptoperidiniopsis	CCMP 1969
173	DINO996-08	GQ501206	Luciella masanensis ribotype 3	Luciella masanensis ribotype 3	Pfiesteria/Cryptoperidiniopsis	CCMP 1833
174	DINO900-08	GQ501199	Pfiesteria-like	Pfiesteria-like group 3	Pfiesteria/Cryptoperidiniopsis	CCMP 1881
175	DINO1056-08	GQ501210	Pfiesteria-like	Luciella masanensis ribotype 3	Pfiesteria/Cryptoperidiniopsis	CCMP 2836
176	DINO583-07	GQ501270	Luciella masanensis ribotype 3	Luciella masanensis ribotype 3	Pfiesteria/Cryptoperidiniopsis	CCMP 1835
177	DINO1055-08	GQ501209	Pfiesteria-like	Luciella masanensis ribotype 3	Pfiesteria/Cryptoperidiniopsis	CCMP 2841
178	DINO1006-08	GQ501197	Luciella masanensis ribotype 1	Luciella masanensis ribotype 1	Pfiesteria/Cryptoperidiniopsis	CCMP 1877
179	DINO995-08	GQ501201	Pfiesteria-like	Luciella masanensis ribotype 3	Pfiesteria/Cryptoperidiniopsis	CCMP 1956
180	DINO898-08	GQ501198	Pfiesteria-like	Luciella masanensis ribotype 1	Pfiesteria/Cryptoperidiniopsis	CCMP 1874
181	DINO486-07	GQ501274	Pfiesteria-like	Cryptoperidiniopsis brodyi	Pfiesteria/Cryptoperidiniopsis	CCMP 2301
182	DINO596-07	GQ501275	Pfiesteria-like	Cryptoperidiniopsis brodyi	Pfiesteria/Cryptoperidiniopsis	CCMP 2181
183	DINO1015-08	GQ501212	Pfiesteria-like	Pfiesteria-like group 3	Pfiesteria/Cryptoperidiniopsis	CCMP 1971
184	DINO904-08	GQ501202	Pfiesteria/Cryptoperidiniopsis	Luciella masanensis ribotype 1	Pfiesteria/Cryptoperidiniopsis	CCMP 1958
185	DINO901-08	GQ501200	Pfiesteria-like	Luciella masanensis ribotype 1	Pfiesteria/Cryptoperidiniopsis	CCMP 1970
186	DINO1043-08	GQ501207	Pfiesteria-like	undetermined*	Pfiestiera/Thoracosphaera	CCMP 2840
187	DINO1009-08	GQ501211	Pfiesteria-like	Luciella masanensis ribotype 3	Pfiesteria/Cryptoperidiniopsis	CCMP 1879
188	DINO991-08	GQ501203	Pfiesteria-like	Luciella masanensis ribotype 1	Pfiesteria/Cryptoperidiniopsis	CCMP 1876
189	DINO495-07	GQ501271	Pfiesteria-like	Pfiesteria-like*	Pfiesteria/Cryptoperidiniopsis	CCMP1845
190	DINO1016-08	GQ501208	Pfiesteria-like	Pfiesteria-like*	Pfiesteria/Cryptoperidiniopsis	CCMP 1880
191	DINO908-08	GQ501205	Pfiesteria-like	Luciella masanensis ribotype 1	Pfiesteria/Cryptoperidiniopsis	CCMP 1965
192	DINO114-06	GQ501282	Polarella glacialis	Polarella glacialis	Polarella	CCMP1383
193	DINO113-06	GQ501283	Polarella glacialis	Polarella glacialis	Polarella	CCMP2088
194	DINO1141-08	GQ501285	Prorocentrum levis	Prorocentrum levis	Prorocentrum genus 1	CCMP2634
195	DINO1144-08	GQ501287	Prorocentrum lima	Prorocentrum lima (x)	Prorocentrum genus 1	CCMP1746
196	DINO1145-08	GQ501286	Prorocentrum lima	Prorocentrum lima (x)	Prorocentrum genus 1	MH (NEPCC712)
197	DINO470-07	GQ501292	Prorocentrum micans	Prorocentrum micans	Prorocentrum genus 2	CCAP 1136/20
198	DINO816-07	GQ501291	Prorocentrum micans	Prorocentrum micans	Prorocentrum genus 2	CCMP1589-MAC
200	Genbank deposited	AB000134	Prorocentrum micans	Prorocentrum micans	Prorocentrum genus 2	NIEB-12
201	Genbank deposited	EU126148	Prorocentrum micans	Prorocentrum micans	Prorocentrum genus 2	CCMP1589
202	DINO061-06	GQ501297	Prorocentrum minimum	Prorocentrum minimum	Prorocentrum genus 2	CCAP1136/16
203	DINO1023-08	GQ501296	Prorocentrum minimum	Prorocentrum minimum	Prorocentrum genus 2	NEPCC 541 (CCMP1329)
204	Genbank deposited	AF463414	Prorocentrum minimum	Prorocentrum minimum	Prorocentrum genus 2	CCMP696
205	DINO144-06	GQ501299	Prorocentrum triestinum	Prorocentrum triestinum	Prorocentrum genus 2	CCMP1919
206	DINO1153-08	GQ501298	Prorocentrum triestinum	Prorocentrum triestinum	Prorocentrum genus 2	CCMP700
207	DINO527-07	GQ501302	Protoceratium reticulatum	Lingulodinium/Protoceratium	Lingulodinium/Protoceratium	CCMP1721
208	DINO707-07	GQ501301	Protoceratium reticulatum	Lingulodinium/Protoceratium	Lingulodinium/Protoceratium	CS-385
209	DINO1127-08	GQ501300	Protoceratium reticulatum	Lingulodinium/Protoceratium	Lingulodinium/Protoceratium	CCMP1720
211	DINO124-06	GQ501305	Pyrocystis lunula	Pyrocystis lunula	Pyrocystis	CCMP731
212	DINO363-07	GQ501306	Pyrocystis lunula	Pyrocystis lunula	Pyrocystis	NEPCC 517
213	DINO013-06	GQ501304	Pyrocystis lunula	Pyrocystis lunula	Pyrocystis	CCAP1131/1 (CCMP730)
214	DINO140-06	GQ501308	Pyrocystis noctiluca	Pyrocystis noctiluca	Pyrocystis	CCMP732
215	DINO412-07	GQ501309	Pyrocystis noctiluca	Pyrocystis noctiluca	Pyrocystis	UTEX 2504 (CCMP732)
216	DINO444-07	GQ501310	Scrippsiella cf. lachrymosa	Scrippsiella Precaria	Scrippsiella/Thoracosphaera	CCMP 2666
217	DINO761-07	GQ501311	Scrippsiella cf. Precaria	Scrippsiella Precaria	Scrippsiella/Thoracosphaera	CS-294/3
218	DINO760-07	GQ501312	Scrippsiella cf. Precaria	Scrippsiella Precaria	Scrippsiella/Thoracosphaera	CS-420
219	DINO759-07	GQ501313	Scrippsiella precaria	Scrippsiella Precaria	Scrippsiella/Thoracosphaera	CS-294/6
220	Genbank deposited	AY786474	Scrippsiella precaria	Scrippsiella Precaria	Scrippsiella/Thoracosphaera	KWO10818-1D6
221	DINO014-06	GQ501321	Scrippsiella sp.	Scrippsiella trochoidea group 3	Scrippsiella	CCAP1134/9
222	DINO711-07	GQ501320	Scrippsiella sp.	Scrippsiella/Thoracosphaera group	Scrippsiella/Thoracosphaera	CS-297
223	DINO763-07	GQ501318	Scrippsiella sp.	Scrippsiella/Thoracosphaera group	Scrippsiella/Thoracosphaera	CS-295/A
224	DINO1084-08	GQ501317	Scrippsiella sp. EB	Scrippsiella/Thoracosphaera group	Scrippsiella/Thoracosphaera	MH
225	Genbank deposited	EU130571	Scrippsiella sp. LIS	Scrippsiella/Thoracosphaera group	Scrippsiella/Thoracosphaera	LIS
226	DINO1089-08	GQ501315	Scrippsiella sp.3	Scrippsiella trochoidea group 3	Scrippsiella	MH
227	DINO1085-08	GQ501316	Scrippsiella sp.4	Scrippsiella trochoidea group 3	Scrippsiella	MH
228	DINO1139-08	GQ501323	Scrippsiella sweeneyae	Scrippsiella sweeneyae	Scrippsiella/Thoracosphaera	NEPCC 280
229	DINO458-07	GQ501331	Scrippsiella trochoidea	Scrippsiella trochoidea group 3	Scrippsiella	CCAP 1134/1
230	DINO544-07	GQ501326	Scrippsiella trochoidea	Scrippsiella/Thoracosphaera group	Scrippsiella/Thoracosphaera	CCMP2810
231	DINO1129-08	GQ501327	Scrippsiella trochoidea	Scrippsiella trochoidea group 3	Scrippsiella	NEPCC 15
232	DINO501-07	GQ501330	Scrippsiella trochoidea	Calciodinellaceae (x)	Scrippsiella/Thoracosphaera	CCMP2775
233	DINO507-07	GQ501325	Scrippsiella trochoidea	Scrippsiella trochoidea	Scrippsiella	CCMP2771
234	DINO505-07	GQ501329	Scrippsiella trochoidea	Scrippsiella trochoidea	Scrippsiella	CCMP2932
235	DINO502-07	GQ501328	Scrippsiella trochoidea	Scrippsiella trochoidea	Scrippsiella	CCMP2797
236	DINO1164-08	GQ501332	Spiniferodinium	Spiniferodinium sp./Togulla jolla	Spiniferodinium sp./Togulla jolla	MH
237	DINO434-07	GQ501334	Symbiodinium goreaui, clade C1	Symbiodinium sp. clade C/F*	Symbiodinium clades B,C,D,F	CCMP 2466
238	DINO330-07	GQ501335	Symbiodinium kawagutii, clade F1	Symbiodinium sp. clade F	Symbiodinium clades B,C,D,F	CCMP2468
239	DINO509-07	GQ501336	Symbiodinium microadriaticum	Symbiodinium sp. clade A3	Symbiodinium sp. clade A	CCMP827
240	DINO327-07	GQ501338	Symbiodinium microadriaticum	Symbiodinium sp. clade B	Symbiodinium clades B,C,D,F	CCMP1633
241	DINO621-07	GQ501340	Symbiodinium microadriaticum clade E	Symbiodinium clade E (x)	Symbiodinium sp. clade E	CCMP 421 (NEPCC 795, NEPCC 737, NEPCC 860)
242	DINO359-07	GQ501339	Symbiodinium microadriaticum clade E	Symbiodinium clade E (x)	Symbiodinium sp. clade E	NEPCC 860 (CCMP421, NEPCC737, NEPCC795
243	Genbank deposited	EU130573	Symbiodinium microadriaticum	Symbiodinium sp. clade B	Symbiodinium clades B,C,D,F	CCMP830
244	DINO1162-08	GQ501337	Symbiodinium pilosum clade A2	Symbiodinium sp. clade A2	Symbiodinium sp. clade A	CCMP2461
245	DINO326-07	GQ501341	Symbiodinium microadriaticum, clade A1	Symbiodinium sp. clade A1	Symbiodinium sp. clade A	CCMP2467
246	DINO540-07	GQ501392	Symbiodinium sp.	Symbiodinium sp. clade A3	Symbiodinium sp. clade A	CCMP2430
247	DINO801-07	GQ501352	Symbiodinium sp. clade A3	Symbiodinium sp. clade A3	Symbiodinium sp. clade A	MAC-CassELI
248	DINO712-07	GQ501384	Symbiodinium sp.	Symbiodinium sp. clade A3	Symbiodinium sp. clade A	CS-152
249	DINO834-07	GQ501369	Symbiodinium sp. clade A1	Symbiodinium sp. clade Ax	Symbiodinium sp. clade A	MAC-04-503
250	DINO623-07	GQ501356	Symbiodinium sp.	Symbiodinium sp. (x)	Symbiodinium sp. clade A	CCMP 2432
251	DINO531-07	GQ501382	Symbiodinium sp.	Symbiodinium sp. clade Ax	Symbiodinium sp. clade A	CCMP2592
252	DINO803-07	GQ501350	Symbiodinium sp.	Symbiodinium sp. clade Ax	Symbiodinium sp. clade A	MAC-Mf 20.04 (04-506)
253	DINO494-07	GQ501360	Symbiodinium sp.	Symbiodinium sp. clade Ax	Symbiodinium sp. clade A	CCMP2433
254	DINO702-07	GQ501389	Symbiodinium sp.	Symbiodinium sp. clade A3	Symbiodinium sp. clade A	CS-162
255	DINO832-07	GQ501377	Symbiodinium sp.	Symbiodinium sp. (x)	Symbiodinium sp. clade A	MAC-04-199
256	DINO830-07	GQ501376	Symbiodinium sp. clade A1	Symbiodinium sp. clade Ax	Symbiodinium sp. clade A	MAC-CassKB8
257	DINO802-07	GQ501351	Symbiodinium sp. clade A1	Symbiodinium sp. clade A3	Symbiodinium sp. clade A	MAC-04-218 SCI.01
258	DINO713-07	GQ501385	Symbiodinium sp.	Symbiodinium sp. clade Ax	Symbiodinium sp. clade A	CS-155
259	DINO715-07	GQ501386	Symbiodinium sp.	Symbiodinium sp. clade A3	Symbiodinium sp. clade A	CS-158
260	DINO703-07	GQ501388	Symbiodinium sp.	Symbiodinium sp. clade Ax	Symbiodinium sp. clade A	CS-160
261	DINO496-07	GQ501378	Symbiodinium sp.	Symbiodinium sp. clade A3	Symbiodinium sp. clade A	CCMP831
262	DINO826-07	GQ501368	Symbiodinium sp.	Symbiodinium sp. clade F	Symbiodinium clades B,C,D,F	MAC-Mf 08.05Tb.03
263	DINO786-07	GQ501394	Symbiodinium sp.	Symbiodinium sp. clade B	Symbiodinium clades B,C,D,F	MAC-25
264	DINO805-07	GQ501348	Symbiodinium sp. clade B	Symbiodinium sp. clade B	Symbiodinium clades B,C,D,F	MAC-Mf13.03b
265	DINO804-07	GQ501347	Symbiodinium sp. clade B	Symbiodinium sp. clade B	Symbiodinium clades B,C,D,F	MAC-Pk704.16 SCI
266	DINO636-07	GQ501353	Symbiodinium sp.	Symbiodinium clade C/F*	Symbiodinium clades B,C,D,F	CCMP 2434
267	DINO701-07	GQ501390	Symbiodinium sp.	Symbiodinium group 1	Symbiodinium clades B,C,D,F	CS-157
268	Genbank deposited	AY289709	Symbiodinium sp. clade B26	Symbiodinium sp. clade B	Symbiodinium clades B,C,D,F	PK702
269	Genbank deposited	AY289708	Symbiodinium sp. Clade E	Symbiodinium sp. clade D	Symbiodinium clades B,C,D,F	CCMP421 (NEPCC 795, NEPCC 737, NEPCC 860)
270	Genbank deposited	AY289710	Symbiodinium sp. Clade D1	Symbiodinium sp. (x)	Symbiodinium clades B,C,D,F	PSP1-05
271	Genbank deposited	EU130572	Symbiodinium sp.	Symbiodinium sp. clade A3	Symbiodinium sp. clade A	CCMP832
272	Genbank deposited	AY289691	Symbiodinium sp. clade A	Symbiodinium sp. clade A3	Symbiodinium sp. clade A	FLCASS
273	Genbank deposited	AY289694	Symbiodinium sp. clade A	Symbiodinium sp. clade Ax	Symbiodinium sp. clade A	Y109
274	Genbank deposited	AY289689	Symbiodinium sp. clade A	Symbiodinium sp. clade Ax	Symbiodinium sp. clade A	FLAp#4
275	Genbank deposited	AY289690	Symbiodinium sp.	Symbiodinium sp. clade Ax	Symbiodinium sp. clade A	FAipt
276	Genbank deposited	AY289693	Symbiodinium sp. clade A1	Symbiodinium sp. clade Ax	Symbiodinium sp. clade A	KB8
277	Genbank deposited	AY289692	Symbiodinium sp. Clade A2	Symbiodinium sp. clade A2	Symbiodinium sp. clade A	Zs
278	Genbank deposited	AY289702	Symbiodinium sp. clade B25	Symbiodinium sp. clade B	Symbiodinium clades B,C,D,F	S571
279	Genbank deposited	AY289712	Symbiodinium sp. clade F5	Symbiodinium sp. clade C/F	Symbiodinium clades B,C,D,F	Mv
280	Genbank deposited	AY289711	Symbiodinium sp. clade B	Symbiodinium sp. clade B	Symbiodinium clades B,C,D,F	PURPFLEX
281	Genbank deposited	AY289705	Symbiodinium sp. clade B	Symbiodinium sp. clade B	Symbiodinium clades B,C,D,F	Pc
282	Genbank deposited	AY289700	Symbiodinium sp. clade B	Symbiodinium sp. clade B	Symbiodinium clades B,C,D,F	Pa
283	Genbank deposited	AY289696	Symbiodinium sp. clade D	Symbiodinium sp. clade B	Symbiodinium clades B,C,D,F	12B1
284	Genbank deposited	AY289699	Symbiodinium sp. clade B	Symbiodinium sp. clade B	Symbiodinium clades B,C,D,F	385B3
285	Genbank deposited	AY289707	Symbiodinium sp. clade B2 .1	Symbiodinium sp. clade B	Symbiodinium clades B,C,D,F	141B2
286	Genbank deposited	AY289698	Symbiodinium sp. clade B	Symbiodinium sp. clade B	Symbiodinium clades B,C,D,F	Ba
287	Genbank deposited	AY289704	Symbiodinium sp. Clade B19	Symbiodinium sp. clade B	Symbiodinium clades B,C,D,F	S579
288	Genbank deposited	AY289697	Symbiodinium sp. clade D1-4 (formerly D1a)	Symbiodinium sp. clade D1-4	Symbiodinium clades B,C,D,F	A002
289	Genbank deposited	AY289703	Symbiodinium sp. clade D2	Symbiodinium sp. (x)	Symbiodinium clades B,C,D,F	HPiH-2
290	Genbank deposited	AY289701	Symbiodinium sp. clade A	Symbiodinium sp. clade Ax	Symbiodinium sp. clade A	Cg
291	DINO521-07	GQ501387	Symbiodinium sp. clade A3	Symbiodinium sp. clade A3	Symbiodinium sp. clade A	CCMP2457
292	DINO622-07	GQ501397	Symbiodinium sp. clade D1-4 (formerly D1a)	Symbiodinium sp. clade D1-4*	Symbiodinium clades B,C,D,F	CCMP 2556 (Mf2.2b)
293	DINO809-07	GQ501343	Symbiodinium sp., clade A, subclade uncharacterised	Symbiodinium sp. clade Ax	Symbiodinium sp. clade A	MAC-351
294	DINO811-07	GQ501380	Symbiodinium sp., clade A, subclade uncharacterised	Symbiodinium sp. clade Ax	Symbiodinium sp. clade A	MAC-358
295	DINO810-07	GQ501344	Symbiodinium sp., clade A, subclade uncharacterised	Symbiodinium sp. clade Ax	Symbiodinium sp. clade A	MAC-357
296	DINO797-07	GQ501358	Symbiodinium sp. clade A1	Symbiodinium sp. clade Ax	Symbiodinium sp. clade A	MAC-Mf 11.04b
297	DINO796-07	GQ501359	Symbiodinium sp. clade A1	Symbiodinium sp. clade Ax	Symbiodinium sp. clade A	MAC-Mf 10.01
298	DINO790-07	GQ501364	Symbiodinium sp. clade A1 (possibly mix of A and B)	Symbiodinium sp. clade Ax	Symbiodinium sp. clade A	MAC-554
299	DINO787-07	GQ501396	Symbiodinium sp. clade A1	Symbiodinium sp. clade Ax	Symbiodinium sp. clade A	MAC-252
300	DINO812-07	GQ501383	Symbiodinium sp., clade A	Symbiodinium sp. clade Ax	Symbiodinium sp. clade A	MAC-677
301	DINO828-07	GQ501374	Symbiodinium sp. clade A1	Symbiodinium sp. clade Ax	Symbiodinium sp. clade A	MAC-Mf 10.02a
302	DINO699-07	GQ501391	Symbiodinium sp., clade A1 or A3	Symbiodinium sp. clade A3	Symbiodinium sp. clade A	CS-161
303	DINO808-07	GQ501346	Symbiodinium sp., clade A	Symbiodinium sp. clade Ax	Symbiodinium sp. clade A	MAC-225
304	DINO799-07	GQ501355	Symbiodinium sp., clade B	Symbiodinium sp. clade B	Symbiodinium clades B,C,D,F	MAC-Mf 01.05b.02 SCI.01
305	DINO798-07	GQ501354	Symbiodinium sp., clade B	Symbiodinium sp. clade B	Symbiodinium clades B,C,D,F	MAC-Mf 01.05b.01 SCI.01
306	DINO789-07	GQ501365	Symbiodinium sp., clade A1	Symbiodinium sp. clade B	Symbiodinium clades B,C,D,F	MAC-498
307	DINO794-07	GQ501361	Symbiodinium sp., clade B	Symbiodinium sp. clade B	Symbiodinium clades B,C,D,F	MAC-Gv 5.6c
308	DINO792-07	GQ501342	Symbiodinium sp., clade B	Symbiodinium sp. clade B	Symbiodinium clades B,C,D,F	MAC-579
309	DINO791-07	GQ501363	Symbiodinium sp., clade B	Symbiodinium sp. clade B	Symbiodinium clades B,C,D,F	MAC-571
310	DINO800-07	GQ501357	Symbiodinium sp., clade B	Symbiodinium sp. clade B	Symbiodinium clades B,C,D,F	MAC-Mf 11.15b
311	DINO824-07	GQ501372	Symbiodinium sp., clade B	Symbiodnium sp.*	Symbiodinium clades B,C,D,F	MAC-Mf 05.01Ba
312	DINO537-07	GQ501393	Symbiodinium sp., clade B1	Symbiodinium sp. clade B	Symbiodinium clades B,C,D,F	CCMP2470
313	DINO894-08	GQ501345	Symbiodinium sp., clade B1	Symbiodinium sp. clade B	Symbiodinium clades B,C,D,F	CCMP 2463
314	DINO1002-08	GQ501362	Symbiodinium sp., clade B2	Symbiodinium sp. clade B	Symbiodinium clades B,C,D,F	CCMP 2459
315	DINO523-07	GQ501395	Symbiodinium sp., clade A2	Symbiodinium clade A2*	Symbiodinium sp. clade A	CCMP2429
317	DINO829-07	GQ501375	Symbiodinium sp., clade F	Symbiodinium sp. clade F	Symbiodinium clades B,C,D,F	MAC-Mf 07.07Ba
318	DINO820-07	GQ501370	Symbiodinium sp. clade F or B	Symbiodinium sp. clade F	Symbiodinium clades B,C,D,F	MAC-Pdiv 45a
319	DINO827-07	GQ501367	Symbiodinium sp., clade F	Symbiodinium sp. clade F	Symbiodinium clades B,C,D,F	MAC-Mf 06.07B
320	DINO825-07	GQ501366	Symbiodinium sp., clade F	Symbiodinium sp. clade F	Symbiodinium clades B,C,D,F	MAC-Mf 08.03Tc.04
321	DINO819-07	GQ501371	Symbiodinium sp., clade F or B	Symbiodinium sp. group 1	Symbiodinium clades B,C,D,F	MAC-Pdiv 44c
322	DINO998-08	GQ501381	Symbiodinium sp., clade B3	Symbiodinium sp. clade B	Symbiodinium clades B,C,D,F	CCMP 2462
323	DINO807-07	GQ501349	Symbiodinium sp., clade F	Symbiodinium sp. clade F	Symbiodinium clades B,C,D,F	MAC-202
324	DINO1142-08	HM236199	Thecadinium yashimaense (inclinatum)	Thecadinium yashimaense (inclinatum)(Canada)	Thecadinium -1	NEPCC 682 (CCMP1890)
325	DINO641-07	HM236200	Thecadinium yashimaense	Thecadinium yashimaense (Germany)	Thecadinium -2	CCMP 2726
326	DINO846-07	GQ501400	Thoracosphaera heimii	Scrippsiella/Thoracosphaera group	Scrippsiella/Thoracosphaera	AC214
327	DINO490-07	GQ501399	Thoracosphaera heimii	Scrippsiella/Thoracosphaera group	Scrippsiella/Thoracosphaera	CCMP1071
328	DINO1130-08	GQ501401	Thoracosphaera heimii	Scrippsiella/Thoracosphaera group	Scrippsiella/Thoracosphaera	NEPCC 670
329	DINO364-07	HM236201	Togula jolla	Spiniferodinium sp./Togulla jolla	Spiniferodinium sp./Togulla jolla	MH
330	DINO489-07	GQ501290	Unidentified	Prorocentrum micans	Prorocentrum genus 2	CCMP701
331	DINO541-07	GQ501333	Unidentified sp.	Symbiodinium sp. clade A3	Symbiodinium sp. clade A	CCMP2915
332	DINO706-07	HM355858	Woloszynskia sp. 4	Woloszynskia sp. 4	Woloszynskia	CS-341
PWD cut-off of Species-O.T.U ≤ 0.24%, Genera 0.T.U≤ 1.4%. Strain Synonyms are indicated in brackets. Identification of COI barcode are explained in the materials and methods. Cross in brackets
indicates a strain is over the species cut-off value for its group, explained in main text. Star indicates a strain shows either partial identity with its barcode group or identity to more
than one barcode group due to insufficient marker resolution. Misidentified strains are highlighted in italics.
