# Supplementary material for: Environmental Barcoding Reveals Massive Dinoflagellate Diversity in Marine Environments
Source: PLoS One. 2010 Nov 15;5(11):e13991. doi: 10.1371/journal.pone.0013991 (PMC2981561; doi:10.1371/journal.pone.0013991)
Supplement: Table S3 — Within group average calculations for seven species to determine presence of paralogues in COI barcodes. Five clones were sequenced per strain, except for CCMP1746 (3 clones) showing that clonal variation in all but one strain was less than 0.2%. Clones of CCMP421 revealed almost 10 times as much diversity compared to that of other dinoflagellates, including another Symbiodinium strain. (0.03 MB XLS) [file pone.0013991.s006.xls]

## Sheet: Sheet1
Table S3: Within group average calculations for seven species to determine presence of paralogues in COI barcodes
Species	Strain	Clones per strain	mean PWD
Prorocentrum minimum	CCAP 1136/16	5	0.001
Prorocentrum micans	CCAP 1136/20	5	0.001
Prorocentrum lima	CCMP 1746	3	0.002
Scrippsiella trochoidea group 3	CCAP 1134/9	5	0.002
Scrippsiella trochoidea	CS-297	5	0.001
Symbiodinium microadriaticum clade E	CCMP421	5	0.013
Symbiodinium microadriaticum clade B	MAC-579	5	0.001
